# Supplementary material for: The Cost-Effectiveness of the SMART Work & Life Intervention for Reducing Sitting Time
Source: MDPI journal article supplement (doi:10.3390/ijerph192214861), 2022-11-11

## Supplementary Appendix

Table S1: Unit costs

| Resource                                  | Unit costs | Sources                                         |
|-------------------------------------------|------------|-------------------------------------------------|
| <b>Primary care</b>                       |            |                                                 |
| General practitioner (GP) - Surgery visit | £33.00     | Personal Social Services Research Unit, 2019    |
| General practitioner (GP) - Home visit    | £107.07    | Personal Social Services Research Unit, 2010    |
| General practitioner (GP) - Phone call    | £15.32     | Personal Social Services Research Unit, 2019    |
| General practice Nurse - Surgery visit    | £5.69      | Personal Social Services Research Unit, 2019    |
| General practice Nurse - Home visit       | £31.44     | Personal Social Services Research Unit, 2010    |
| General practice Nurse - Phone call       | £6.00      | Personal Social Services Research Unit, 2019    |
| NHS Walk-in Centre Visit                  | £46.00     | NICE guideline 94 (2018)                        |
| NHS Urgent Care Centre Visit              | £67.00     | NICE guideline 94 (2018)                        |
| <b>Community services</b>                 |            |                                                 |
| Occupational Health Nurse                 | £39.42     | NHS reference costs 2017/2018                   |
| <b>Mental health care</b>                 |            |                                                 |
| Mental health nurse                       | £92.00     | Personal Social Services Research Unit, 2019    |
| Other counsellor/therapist                | £182.71    | NHS Reference cost 2017/18 [MHSTOTHPLA]         |
| <b>Secondary care</b>                     |            |                                                 |
| Accident and Emergency Visit              | £112.41    | Personal Social Services Research Unit, 2010    |
| Hospital outpatient appointments          | £137.58    | NHS reference costs 2017/2018 [General Surgery] |

Table S2: Imputed HRQoL, QALY and absenteeism by treatment arm and follow-up period

|                          | SWAL-desk |         |          | SWAL-only |         |          | Control  |         |          |
|--------------------------|-----------|---------|----------|-----------|---------|----------|----------|---------|----------|
|                          | Baseline  | Month 3 | Month 12 | Baseline  | Month 3 | Month 12 | Baseline | Month 3 | Month 12 |
| EQ-5D-5L                 | 0.90031   | 0.90788 | 0.89748  | 0.89944   | 0.90484 | 0.89473  | 0.90333  | 0.90272 | 0.89956  |
| (Mapped) EQ-5D-3L        | 0.84358   | 0.85060 | 0.83568  | 0.83693   | 0.84956 | 0.83969  | 0.84589  | 0.84893 | 0.84260  |
| QALYs (5L) <sup>†</sup>  | -         | -       | 0.89879  | -         | -       | 0.89520  | -        | -       | 0.89832  |
| QALYs (3L) <sup>*†</sup> | -         | -       | 0.84144  | -         | -       | 0.84113  | -        | -       | 0.84712  |
| Absenteeism (days)       | 0.81917   |         | 1.61583  | 0.95984   |         | 1.40884  | 1.47865  |         | 1.06891  |

<sup>†</sup> Total within-trial QALYs average imputed values; all other outcomes presented as the average of complete cases

<sup>\*</sup>Calculated from EQ-5D-3L scores mapped from EQ-5D-5L responses

Table S3: Base case QALY regression – ordinary least squares regression

|               | Coef.  | St.Err. | t-value | p-value | [95% Conf | Interval] | Sig |
|---------------|--------|---------|---------|---------|-----------|-----------|-----|
| Baseline EQ5D | 0.348  | 0.044   | 7.91    | 0.000   | 0.261     | 0.435     | *** |
| SWAL-only     | 0.005  | 0.011   | 0.4     | 0.690   | -0.018    | 0.027     |     |
| SWAL-desk     | -0.001 | 0.015   | -0.03   | 0.973   | -0.032    | 0.031     |     |
| Age           | -0.001 | 0.001   | -1.19   | 0.244   | -0.002    | 0.001     |     |
| Female        | -0.014 | 0.012   | -1.2    | 0.240   | -0.039    | 0.010     |     |
| Non-white     | 0.003  | 0.013   | 0.25    | 0.807   | -0.023    | 0.030     |     |
| Baseline bmi  | -0.002 | 0.001   | -1.98   | 0.051   | -0.004    | 0.000     | *   |
| Salford       | -0.002 | 0.011   | -0.15   | 0.885   | -0.023    | 0.020     |     |
| Liverpool     | 0.004  | 0.013   | 0.34    | 0.731   | -0.021    | 0.030     |     |
| Large cluster | 0.002  | 0.012   | 0.13    | 0.898   | -0.023    | 0.026     |     |
| Constant      | 0.646  | 0.054   | 11.95   | 0.000   | 0.539     | 0.753     | *** |

\*\*\*  $p < 0.01$ , \*\*  $p < 0.05$ , \*  $p < 0.1$

EQ5D: Euroqol 5-level; SWAL: SMART Work & Life; Coef: Coefficient; St.Err: Standard Error; Sig: Significance; bmi: Body mass index

Table S4: Complete case secondary outcomes

| Mean (SD)                            | Baseline value |                |                | 3 months       |                |                | 12 months      |                |                | Change at 3 months |                 |                 | Change at 12 months |                 |                 |
|--------------------------------------|----------------|----------------|----------------|----------------|----------------|----------------|----------------|----------------|----------------|--------------------|-----------------|-----------------|---------------------|-----------------|-----------------|
|                                      | Control        | SWAL-only      | SWAL-desk      | Control        | SWAL-only      | SWAL-desk      | Control        | SWAL-only      | SWAL-desk      | Control            | SWAL-only       | SWAL-desk       | Control             | SWAL-only       | SWAL-desk       |
| <b>Stress <sup>a</sup></b>           | 15.9<br>(6.52) | 16.4<br>(7.02) | 16.7<br>(1.00) | 16.0<br>(6.69) | 16.1<br>(6.55) | 15.3<br>(6.83) | 16.1<br>(6.54) | 16.3<br>(6.61) | 15.6<br>(7.16) | 0.43<br>(5.10)     | -0.26<br>(5.41) | -0.58<br>(5.64) | 0.44<br>(5.16)      | -0.12<br>(5.55) | -0.24<br>(5.57) |
| <b>Wellbeing <sup>b</sup></b>        | 54.7<br>(20.1) | 54.0<br>(20.3) | 55.4<br>(19.6) | 56.2<br>(20.6) | 57.0<br>(21.5) | 58.9<br>(20.0) | 55.6<br>(20.6) | 55.5<br>(20.6) | 57.8<br>(20.1) | 0.05<br>(13.9)     | 2.46<br>(16.3)  | 2.37<br>(17.0)  | 0.69<br>(14.5)      | 2.06<br>(19.7)  | 2.12<br>(15.8)  |
| <b>Job performance <sup>c</sup></b>  | 5.52<br>(1.01) | 5.54<br>(1.05) | 5.53<br>(0.93) | 5.45<br>(1.00) | 5.47<br>(1.02) | 5.44<br>(0.99) | 5.35<br>(0.99) | 5.45<br>(1.08) | 5.46<br>(0.98) | 0.06<br>(0.82)     | -0.02<br>(0.96) | -0.11<br>(0.99) | -0.12<br>(0.94)     | -0.10<br>(1.03) | -0.06<br>(1.10) |
| <b>Job satisfaction <sup>d</sup></b> | 4.80<br>(1.38) | 4.97<br>(1.29) | 4.89<br>(1.24) | 4.79<br>(1.41) | 4.98<br>(1.30) | 4.76<br>(1.30) | 4.69<br>(1.40) | 5.01<br>(1.33) | 4.74<br>(1.29) | -0.02<br>(0.98)    | 0.04<br>(0.94)  | -0.10<br>(1.04) | -0.07<br>(1.17)     | 0.01<br>(1.17)  | -0.14<br>(1.27) |
| <b>Work engagement <sup>e</sup></b>  |                |                |                |                |                |                |                |                |                |                    |                 |                 |                     |                 |                 |
| Vigour                               | 3.31<br>(1.33) | 3.42<br>(1.27) | 3.30<br>(1.25) | 3.38<br>(1.34) | 3.52<br>(1.19) | 3.50<br>(1.19) | 3.35<br>(1.29) | 3.59<br>(1.14) | 3.46<br>(1.17) | 0.09<br>(0.86)     | 0.10<br>(0.95)  | 0.16<br>(0.87)  | 0.05<br>(0.96)      | 0.17<br>(0.93)  | 0.16<br>(0.98)  |
| Dedication                           | 4.13<br>(1.22) | 4.23<br>(1.23) | 4.09<br>(1.16) | 4.04<br>(1.14) | 4.11<br>(1.17) | 4.10<br>(1.04) | 4.00<br>(1.18) | 4.22<br>(1.16) | 4.06<br>(1.08) | -0.09<br>(0.75)    | -0.10<br>(0.77) | 0.02<br>(0.75)  | -0.11<br>(0.85)     | -0.05<br>(0.84) | -0.02<br>(0.94) |
| Absorption                           | 4.14<br>(1.13) | 4.22<br>(1.11) | 4.16<br>(1.06) | 4.11<br>(1.01) | 4.15<br>(0.99) | 4.24<br>(1.01) | 4.11<br>(1.04) | 4.21<br>(1.06) | 4.26<br>(1.06) | 0.02<br>(0.90)     | -0.07<br>(0.82) | 0.05<br>(0.80)  | 0.06<br>(0.87)      | -0.08<br>(0.93) | 0.08<br>(0.94)  |
| Overall                              | 3.86<br>(1.10) | 3.96<br>(1.08) | 3.85<br>(1.01) | 3.84<br>(1.05) | 3.93<br>(1.02) | 3.94<br>(0.97) | 3.82<br>(1.04) | 4.00<br>(1.01) | 3.93<br>(1.00) | 0.00<br>(0.66)     | -0.03<br>(0.67) | 0.08<br>(0.61)  | -0.00<br>(0.73)     | 0.01<br>(0.71)  | 0.07<br>(0.78)  |

<sup>a</sup> Stress (Never=0; Very Often=4), score 0-40, with higher score indicating greater stress; <sup>b</sup> Wellbeing No time = 1, all of the time = 5, score 0-100, with a higher score indicating higher wellbeing; <sup>c</sup> Job performance (1 = Very Poorly; 7 = Extremely Well); <sup>d</sup> Job satisfaction (1 = Dissatisfied; 7 = Extremely Satisfied); <sup>e</sup> Work engagement (0 = Never; 6 Always), higher scores indicate greater work engagement

Table S5: Base case absenteeism days regression - generalised linear model (family ~ gamma; link – log)

|                      | Coef.  | St.Err. | t-value | p-value | [95% Conf | Interval] | Sig |
|----------------------|--------|---------|---------|---------|-----------|-----------|-----|
| Baseline absenteeism | 0.062  | 0.04    | 1.56    | 0.122   | -0.017    | 0.141     |     |
| SWAL-only            | 0.233  | 0.398   | 0.58    | 0.567   | -0.615    | 1.080     |     |
| SWAL-desk            | 0.401  | 0.495   | 0.81    | 0.433   | -0.677    | 1.480     |     |
| Age                  | 0.019  | 0.014   | 1.40    | 0.173   | -0.009    | 0.047     |     |
| Female               | 0.152  | 0.373   | 0.41    | 0.687   | -0.612    | 0.915     |     |
| Non-white            | 0.638  | 0.388   | 1.65    | 0.109   | -0.151    | 1.428     |     |
| Baseline bmi         | 0.027  | 0.036   | 0.75    | 0.47    | -0.053    | 0.107     |     |
| Salford              | -0.016 | 0.339   | -0.05   | 0.963   | -0.686    | 0.654     |     |
| Liverpool            | -0.213 | 0.596   | -0.36   | 0.728   | -1.517    | 1.092     |     |
| Large cluster        | 0.334  | 0.430   | 0.78    | 0.453   | -0.611    | 1.279     |     |
| Constant             | -2.188 | 1.141   | -1.92   | 0.08    | -4.681    | 0.305     | *   |

\*\*\* $p<0.01$ , \*\* $p<0.05$ , \* $p<0.1$

SWAL: SMART Work & Life; Coef: Coefficient; St.Err: Standard Error; Sig: Significance; bmi: Body mass index

Table S6: Intervention costs

|                                                                             | Costs       |                    |
|-----------------------------------------------------------------------------|-------------|--------------------|
|                                                                             | Trial total | Per ITT individual |
| <b>SMART Work &amp; Life Plus Desk (n=240)</b>                              |             |                    |
| Direct costs of providing workplace champion training <sup>1</sup>          | £1,776.00   | £7.40              |
| Participant time to engage with components costs <sup>2</sup>               | £13,076.91  | £54.49             |
| Workplace champions' training time costs                                    | £1,419.84   | £5.92              |
| Workplace champions' facilitation time costs                                | £3,590.40   | £14.96             |
| Correspondence to managers                                                  | £145.19     | £0.60              |
| Desk purchases                                                              | £34,041.79  | £141.84            |
| Desk set-up labour costs                                                    | £720.00     | £3.00              |
| Motivational materials                                                      | £25.00      | £0.10              |
| Total                                                                       | £54,795.13  | £228.31            |
| <b>SMART Work &amp; Life (n=249)</b>                                        |             |                    |
| Direct costs of providing workplace champion training training <sup>1</sup> | £1,776.00   | £7.13              |
| Participant time to engage with components costs <sup>2</sup>               | £12,377.61  | £49.71             |
| Workplace champions training time costs                                     | £1,321.92   | £5.31              |
| Workplace champions' facilitation time costs                                | £4,412.93   | £17.72             |
| Correspondence to managers                                                  | £151.03     | £0.61              |
| Motivational materials                                                      | £27         | £0.11              |
| Total                                                                       | £20,066.49  | £80.59             |

1 Planning and preparation training session, travel, delivery of training

2 Online education sessions; reading monthly emails; installation and set-up of self-monitoring apps/software; sitting less challenges and coaching sessions

Table S7: Complete case within-trial costs by treatment arm and resource category

|                              | SWAL-desk |              |          | SWAL-only |               |           | Control |              |          |
|------------------------------|-----------|--------------|----------|-----------|---------------|-----------|---------|--------------|----------|
|                              | N         | Mean (SD)    | Min, Max | N         | Mean (SD)     | Min, Max  | N       | Mean (SD)    | Min, Max |
| <b>Complete case</b>         |           |              |          |           |               |           |         |              |          |
| <b>Primary care</b>          |           |              |          |           |               |           |         |              |          |
| GP surgery visit             | 136       | 71.82 (90)   | (0,528)  | 125       | 96.62 (251)   | (0,2574)  | 116     | 87.05 (130)  | (0,726)  |
| GP home visit                | 136       | 0.00 (0)     | (0,0)    | 125       | 0.00 (0)      | (0,0)     | 116     | 0.00 (0)     | (0,0)    |
| GP phone call                | 136       | 9.01 (24)    | (0,153)  | 125       | 6.86 (18)     | (0,123)   | 116     | 9.77 (29)    | (0,214)  |
| GP nurse surgery visit       | 136       | 6.02 (13)    | (0,114)  | 125       | 5.37 (10)     | (0,57)    | 116     | 4.91 (9)     | (0,46)   |
| GP nurse visit               | 136       | 0.46 (5)     | (0,63)   | 125       | 0.00 (0)      | (0,0)     | 116     | 0.00 (0)     | (0,0)    |
| GP nurse phone call          | 136       | 0.35 (2)     | (0,12)   | 125       | 0.1 (1)       | (0,12)    | 116     | 0.21 (2)     | (0,12)   |
| NHS walk-in centre visit     | 136       | 2.71 (19)    | (0,184)  | 125       | 12.51 (41)    | (0,276)   | 116     | 6.34 (23)    | (0,92)   |
| NHS urgent care centre visit | 136       | 1.97 (16)    | (0,134)  | 125       | 5.36 (26)     | (0,134)   | 116     | 3.47 (21)    | (0,134)  |
| <b>Community services</b>    |           |              |          |           |               |           |         |              |          |
| Occupational Health Nurse    | 136       | 2.90 (28)    | (0,315)  | 125       | 4.42 (31)     | (0,237)   | 116     | 6.80 (40)    | (0,394)  |
| <b>Mental health care</b>    |           |              |          |           |               |           |         |              |          |
| Mental health nurse          | 136       | 2.71 (22)    | (0,184)  | 125       | 1.47 (16)     | (0,184)   | 116     | 1.59 (17)    | (0,184)  |
| Other counsellor/therapist   | 136       | 150.47 (684) | (0,5481) | 125       | 242.64 (835)  | (0,7308)  | 116     | 207.91 (631) | (0,4385) |
| <b>Secondary care</b>        |           |              |          |           |               |           |         |              |          |
| Accident and Emergency Visit | 136       | 14.88 (62)   | (0,450)  | 125       | 8.99 (53)     | (0,450)   | 116     | 15.50 (64)   | (0,450)  |
| Outpatient appointments      | 136       | 153.77 (343) | (0,2476) | 125       | 123.27 (289)  | (0,1926)  | 116     | 142.32 (247) | (0,1101) |
| Inpatient days               | 136       | 0 (0)        | (0,0)    | 125       | 65.59 (733)   | (0,8199)  | 116     | 11.76 (89)   | (0,682)  |
| <b>Total</b>                 |           |              |          |           |               |           |         |              |          |
| Total health-related costs   | 136       | 417.07 (825) | (0,5481) | 125       | 573.21 (1425) | (0,11805) | 116     | 497.63 (839) | (0,5837) |

Table S8: Base case health resource cost regression – generalised linear model (family ~ gamma; link – log)

|               | Coef.  | St.Err. | t-value | p-value | [95% Conf | Interval] | Sig |
|---------------|--------|---------|---------|---------|-----------|-----------|-----|
| SWAL-only     | -0.054 | 0.141   | -0.39   | 0.700   | -0.333    | 0.224     |     |
| SWAL-desk     | -0.215 | 0.147   | -1.46   | 0.147   | -0.507    | 0.077     |     |
| Age           | -0.010 | 0.006   | -1.59   | 0.117   | -0.023    | 0.003     |     |
| Female        | 0.416  | 0.157   | 2.65    | 0.011   | 0.100     | 0.732     | **  |
| Non-white     | -0.072 | 0.168   | -0.43   | 0.672   | -0.414    | 0.271     |     |
| Baseline bmi  | 0.034  | 0.012   | 2.86    | 0.006   | 0.010     | 0.058     | *** |
| Salford       | -0.076 | 0.150   | -0.50   | 0.615   | -0.372    | 0.221     |     |
| Liverpool     | -0.392 | 0.233   | -1.68   | 0.100   | -0.861    | 0.077     | *   |
| Large cluster | 0.280  | 0.141   | 1.99    | 0.051   | -0.002    | 0.562     | *   |
| Constant      | 5.647  | 0.381   | 14.82   | 0.000   | 4.894     | 6.400     | *** |

\*\*\* $p<0.01$ , \*\* $p<0.05$ , \* $p<0.1$

SWAL: SMART Work & Life; Coef: Coefficient; St.Err: Standard Error; Sig: Significance; bmi: Body mass index

Table S9: Model parameters

|                                         | Base case values | PSA distributional form |              |      | Source                            |
|-----------------------------------------|------------------|-------------------------|--------------|------|-----------------------------------|
| <b>Cohort characteristics</b>           |                  | Distribution            | Mean         | SD   |                                   |
| Sex (male)                              | 27.65%           | N/A                     |              |      | SMART Work & Life trial           |
| Age (at extrapolation)                  | 41               | N/A                     |              |      | SMART Work & Life trial           |
| Baseline sedentary time (minutes/day)   | 605.24 minutes   | Normal                  | 605.2        | 82.2 | SMART Work & Life trial           |
| <b>Treatment effect</b>                 |                  |                         |              |      |                                   |
| SWAL-desk (reduction in sedentary time) | 63.7 minutes     | Normal                  | 63.7         | 8.34 | SMART Work & Life trial           |
| SWAL-only (reduction in sedentary time) | 22.2 minutes     | Normal                  | 22.2         | 8.44 | SMART Work & Life trial           |
| Annual treatment-effect decay rate      | 50%              | -                       | -            | -    | Assumed in prior works (37,38,48) |
| Sedentary associated all-cause hazards  | See Figure 1     | Normal                  | See Figure 1 |      | Ekelund et al (16)                |
| <b>Discount rate</b>                    |                  |                         |              |      |                                   |
| Costs                                   | 3.5%             | N/A                     |              |      | NICE Methods Guide (20)           |
| QALYs                                   | 3.5%             | N/A                     |              |      | NICE Methods Guide (20)           |



Figure S1: Ekelund et al interpolated hazard ratios

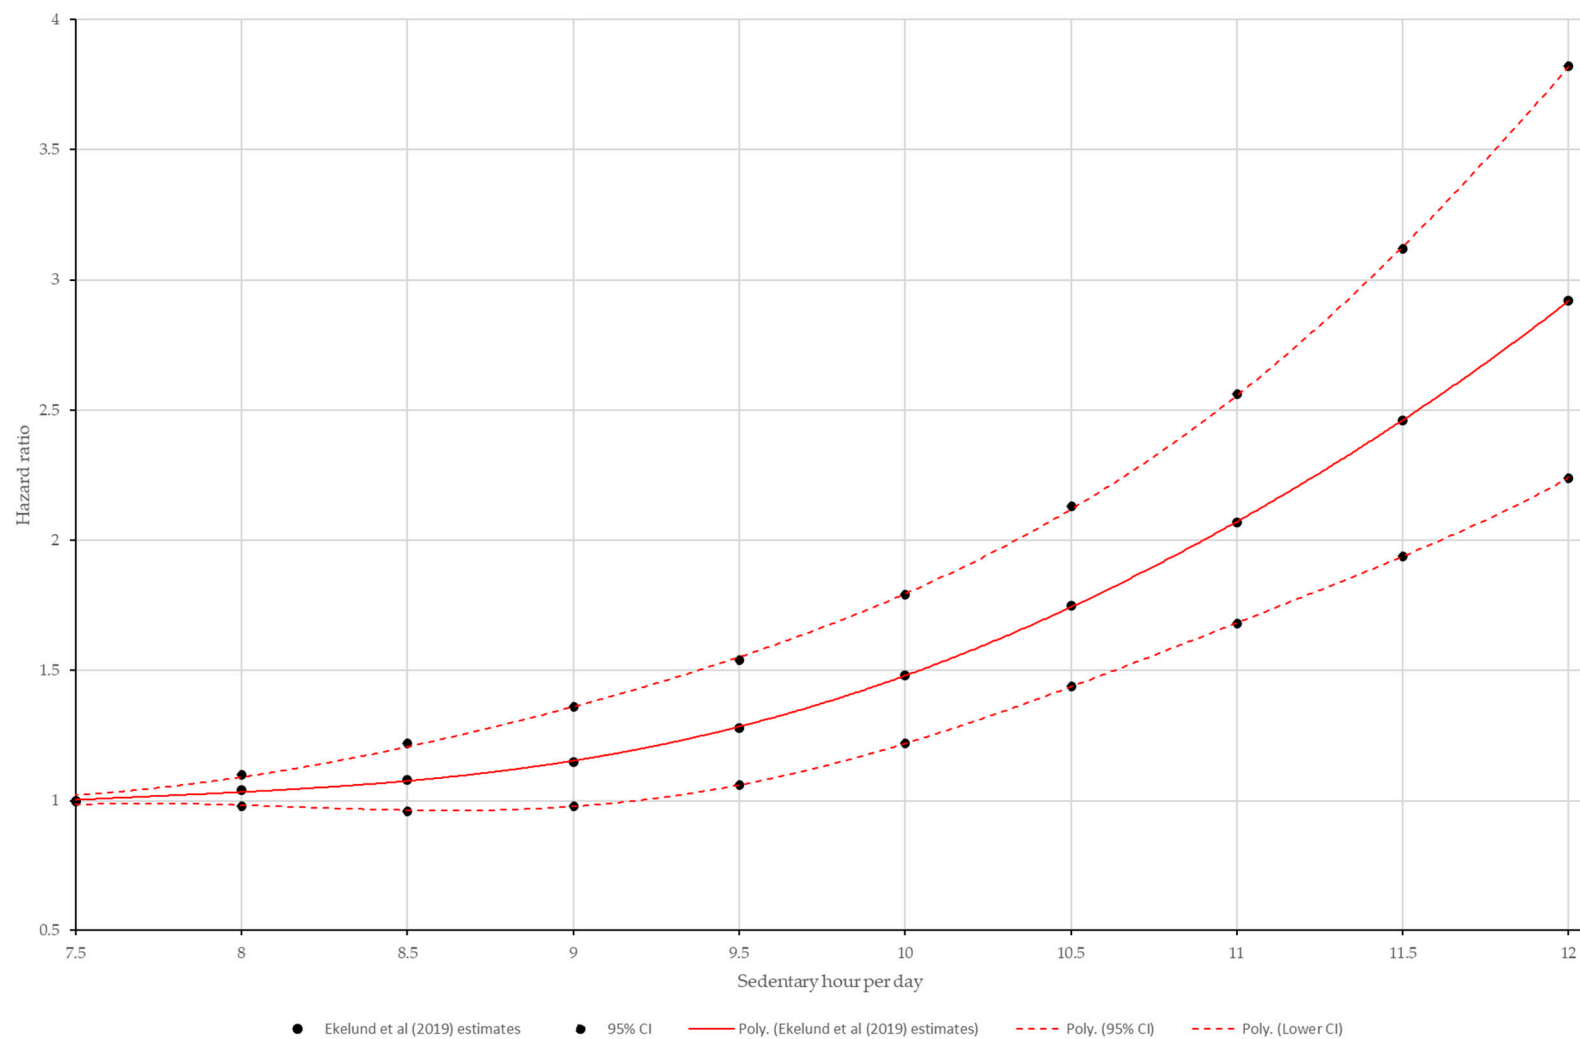

Figure S2: Sedentary time modelled for each comparator

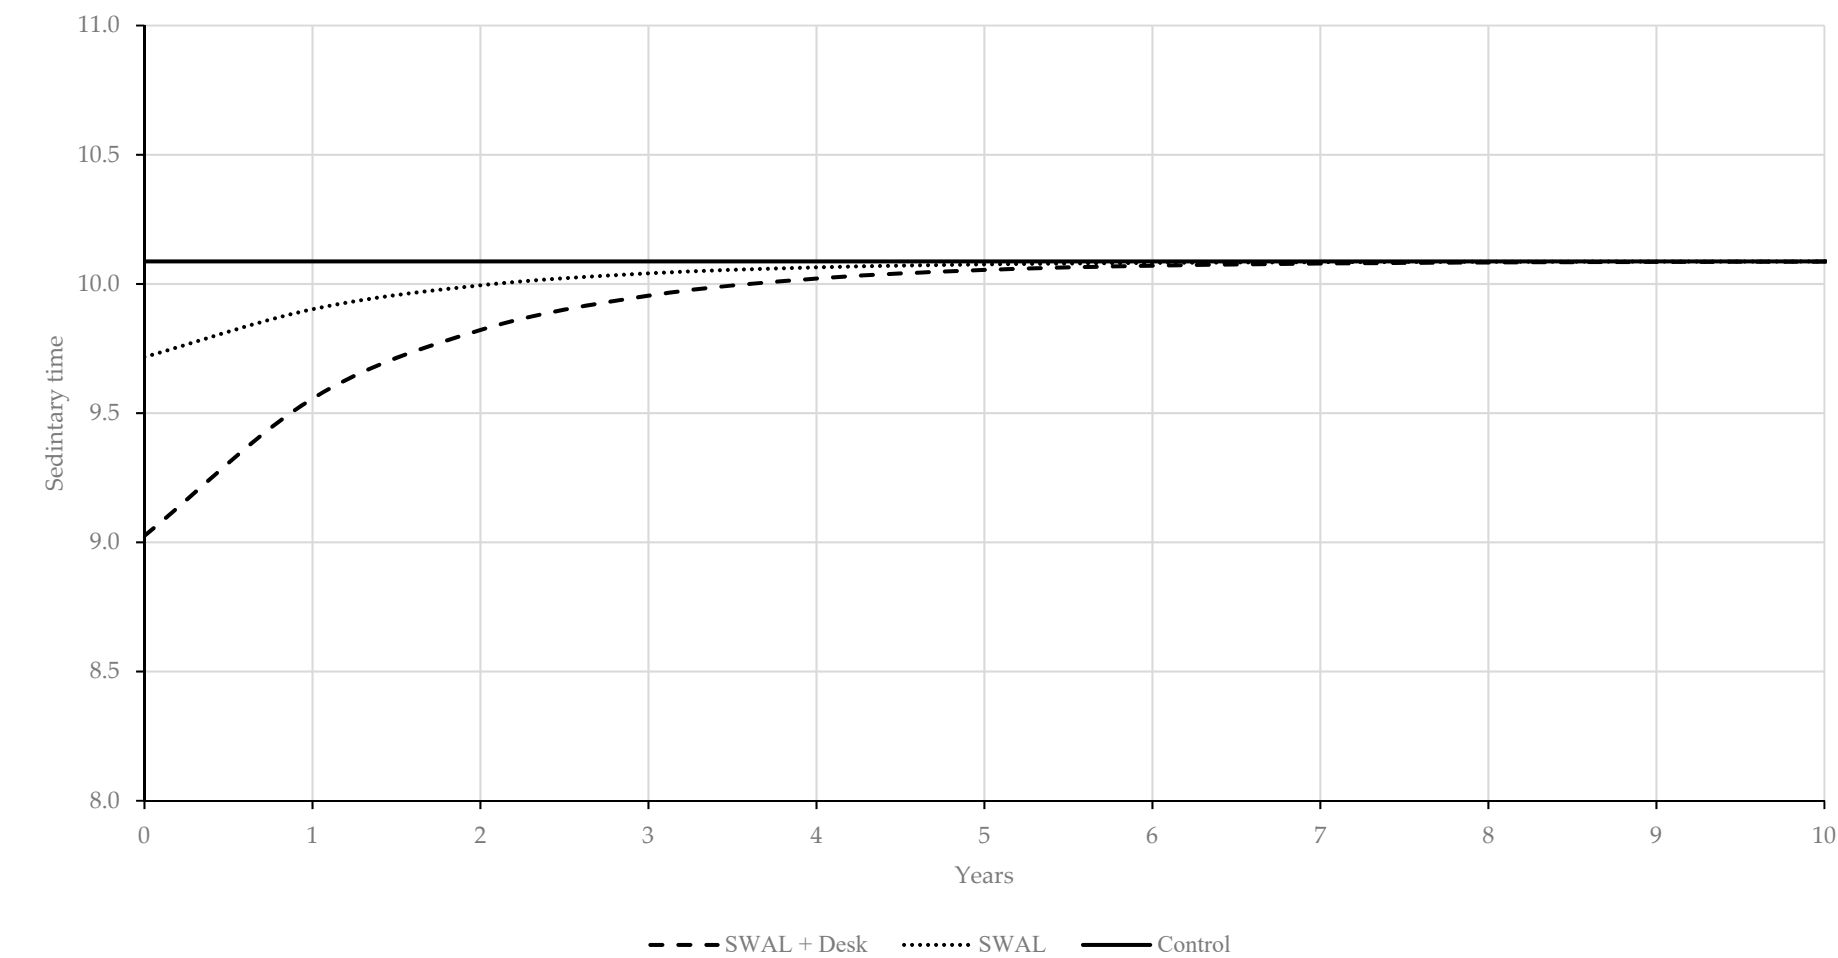

Figure S3: Hazard ratios associated with the sedentary time modelled for each comparator

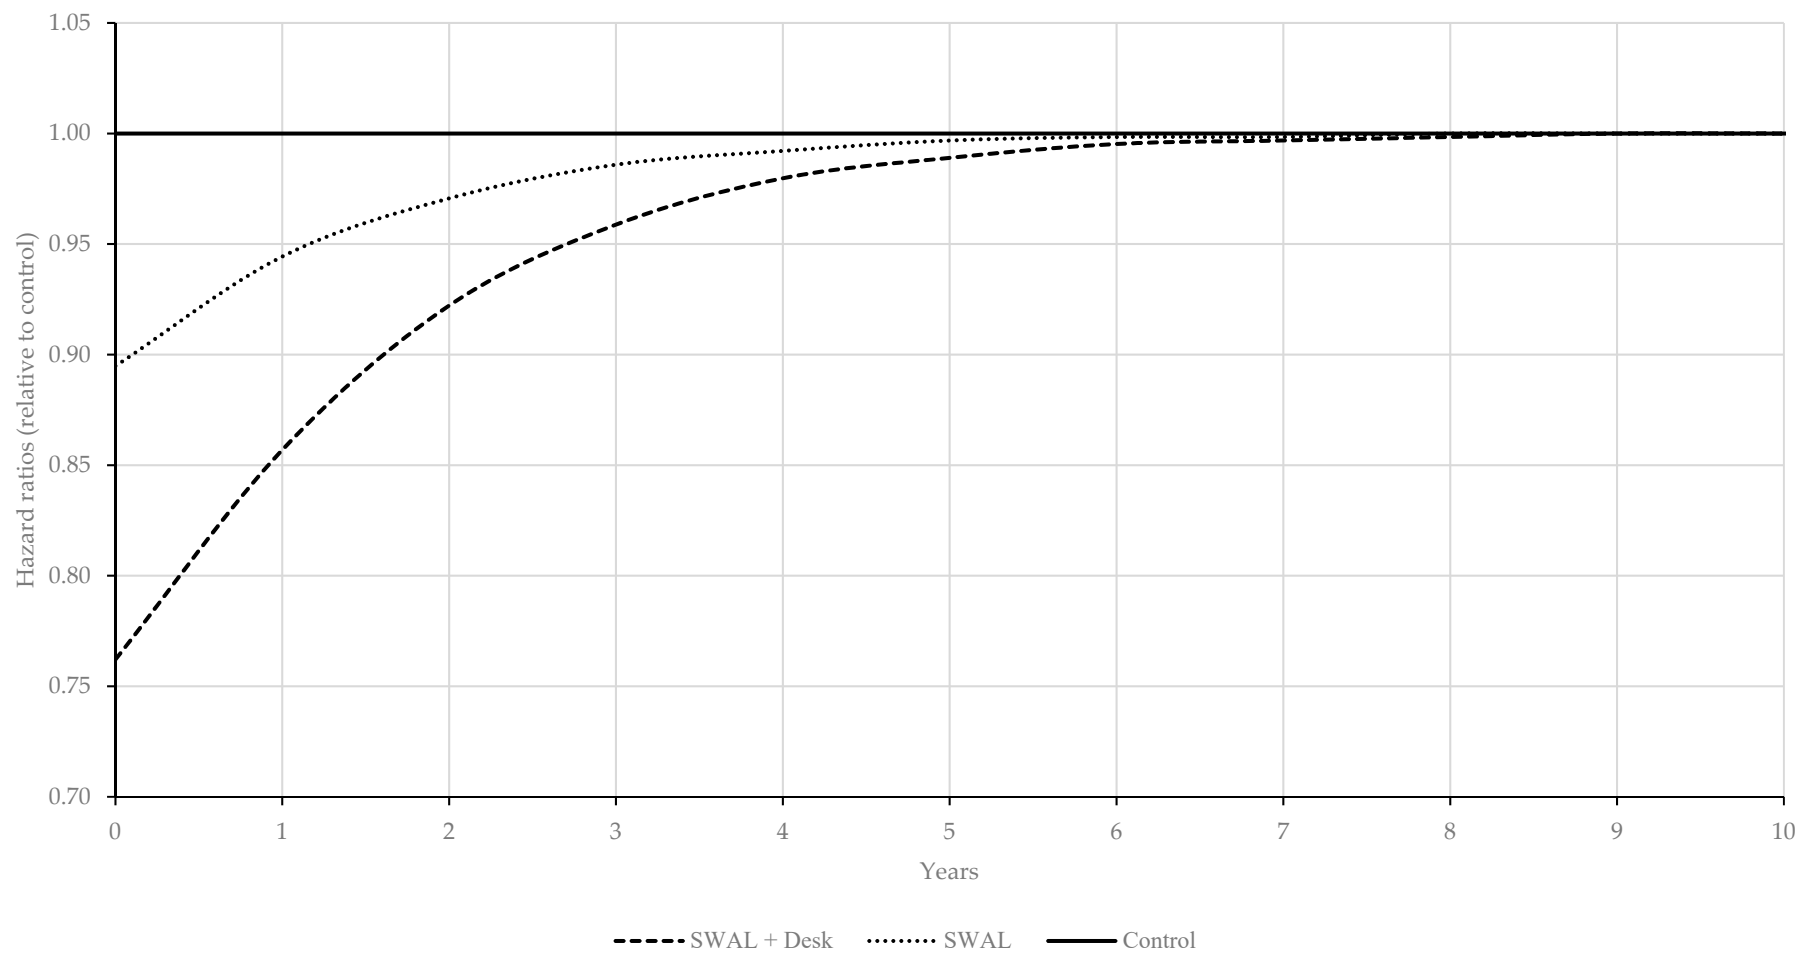

Figure S4: Incremental net health benefits for alternative age and treatment decay profiles at a cost-effectiveness threshold of £20,000 per QALY

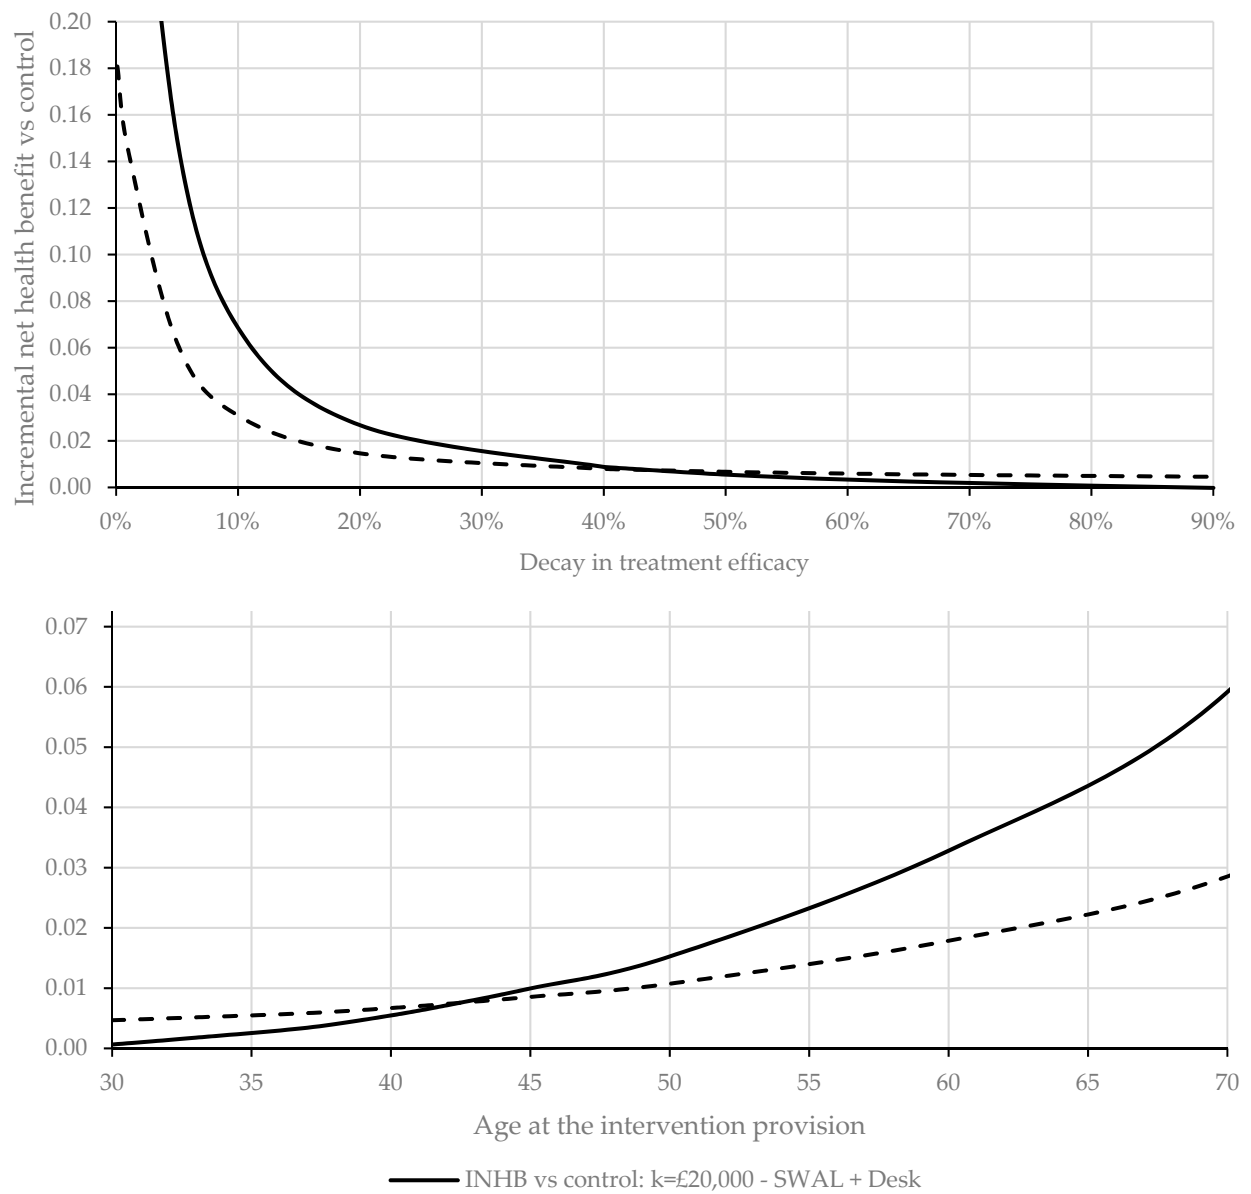

Figure S5: Incremental net health benefits for alternative age and treatment decay profiles at a cost-effectiveness threshold of £30,000 per QALY

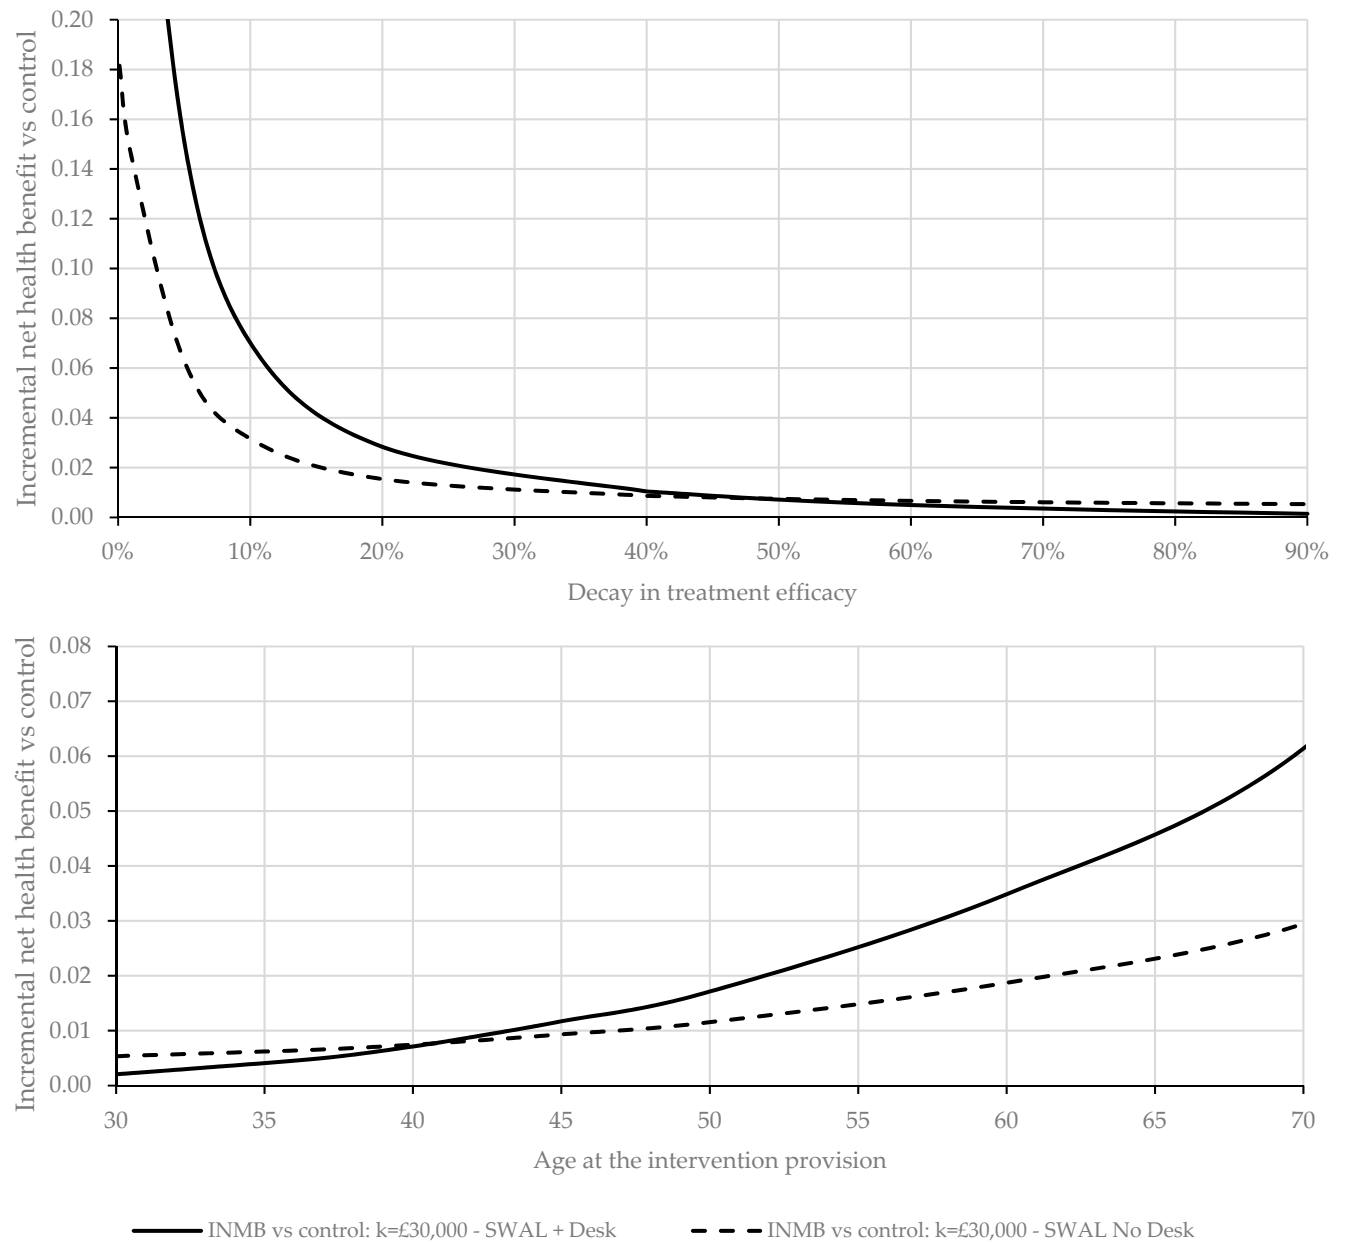

Supplement: s1 [file s1]
